# Supplementary material for: A dual-strategy of interface and reconstruction engineering to boost efficient alkaline water and seawater oxidation
Source: Royal Society of Chemistry journal article supplement (doi:10.1039/d2se01200f), 2022-01-01
Supplement: d2se01200f1.pdf [file d2se01200f1.pdf]

## Supplementary Material

### **Dual-strategy of interface and reconstruction engineering to boost efficient alkaline water and seawater oxidation**

Dongxue Guo, Mengya Zong, Zhe Zhao, Cunzheng Fan, Danhong Wang\*

TKL of Metal and Molecule Based Material Chemistry, College of Chemistry, School  
of Materials Science and Engineering, Nankai University, Tianjin 300350, China

\*Corresponding author.

*E-mail address:* [dhwang@nankai.edu.cn](mailto:dhwang@nankai.edu.cn) (D.-H. Wang)

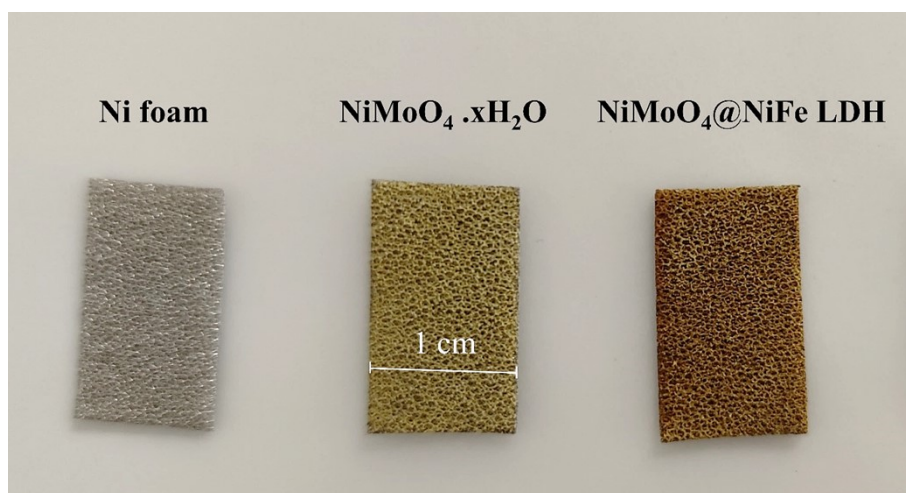

**Fig. S1.** Optical photographs of Ni foam, NiMoO<sub>4</sub>.xH<sub>2</sub>O and NiMoO<sub>4</sub>@NiFe LDH.

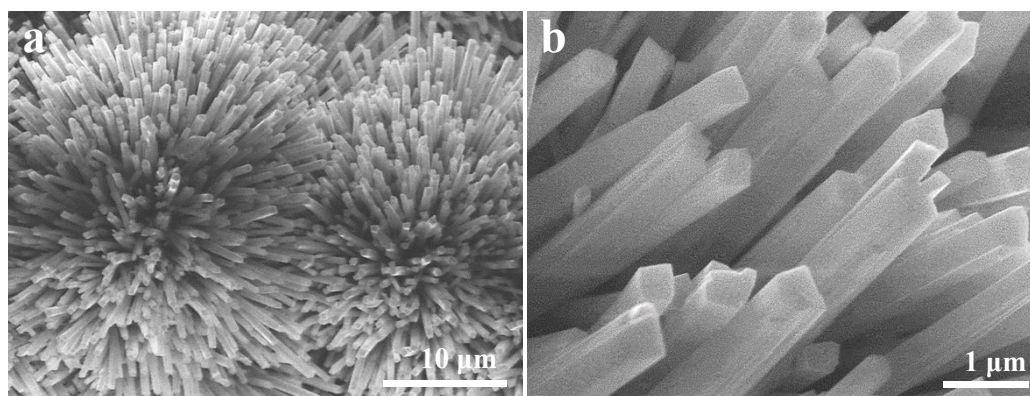

**Fig. S2.** SEM images at low (a) and high (b) magnifications for NiMoO<sub>4</sub>.xH<sub>2</sub>O.

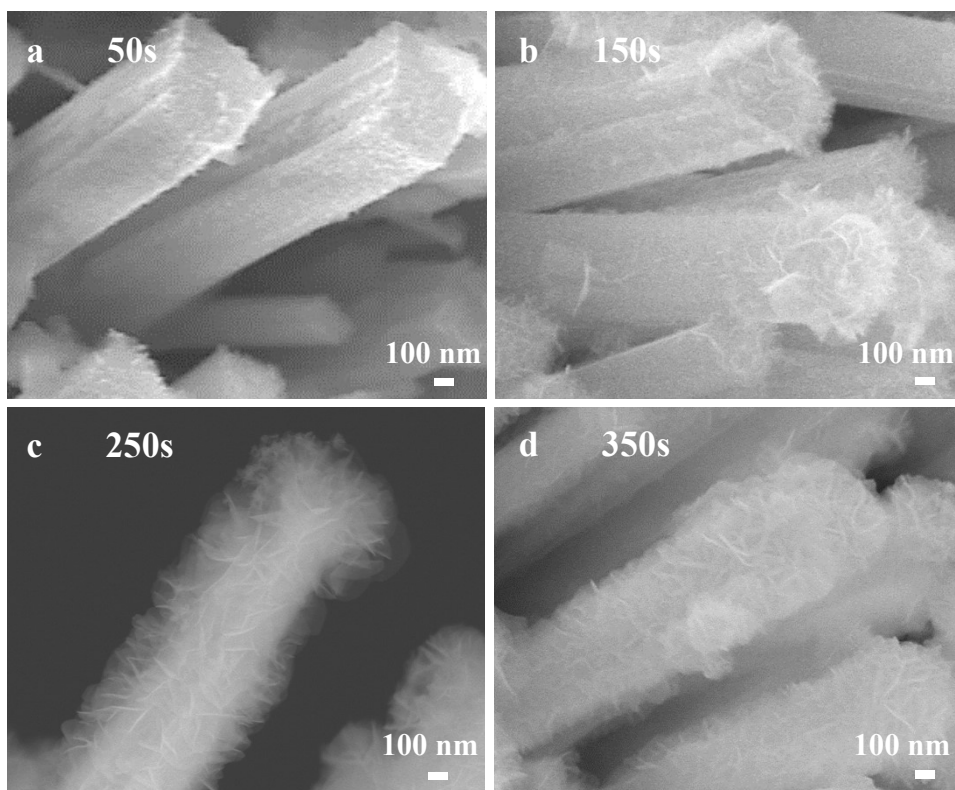

**Fig. S3.** SEM images of NiMoO<sub>4</sub>@NiFe LDH with different electrodeposition time of NiFe LDH.

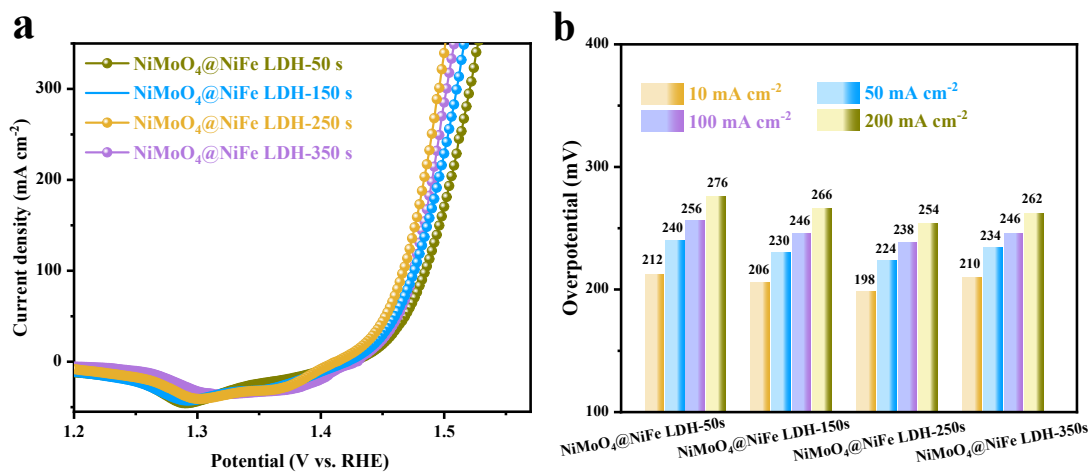

**Fig. S4.** OER polarization curves of NiMoO<sub>4</sub>@NiFe LDH with different electrodeposition time of NiFe LDH tested in 1 M KOH electrolyte. (b) Comparison of the overpotentials required for these catalysts to attain current densities of 10, 50, 100, and 200 mA cm<sup>-2</sup> for OER.

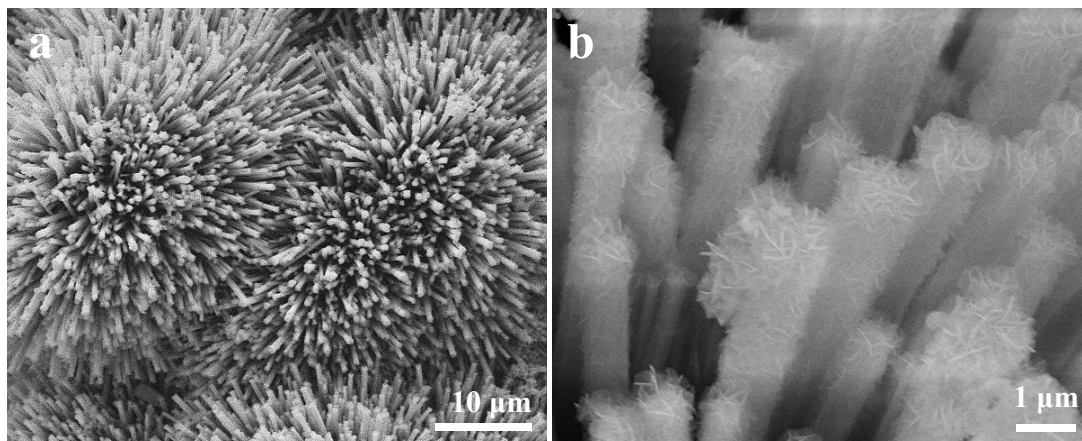

**Fig. S5.** SEM images at low (a) and high (b) magnifications for NiMoO<sub>4</sub>@NiFe LDH-250 s.

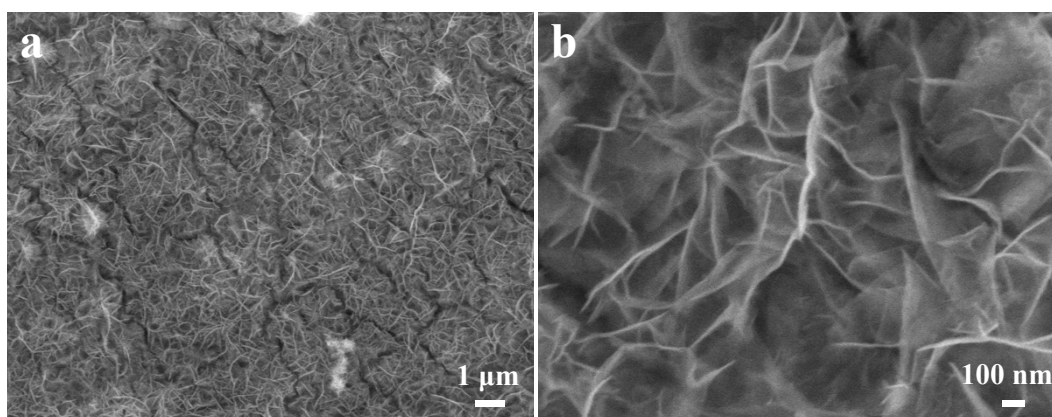

**Fig. S6.** SEM images at low (a) and high (b) magnifications for NiFe LDH/NF.

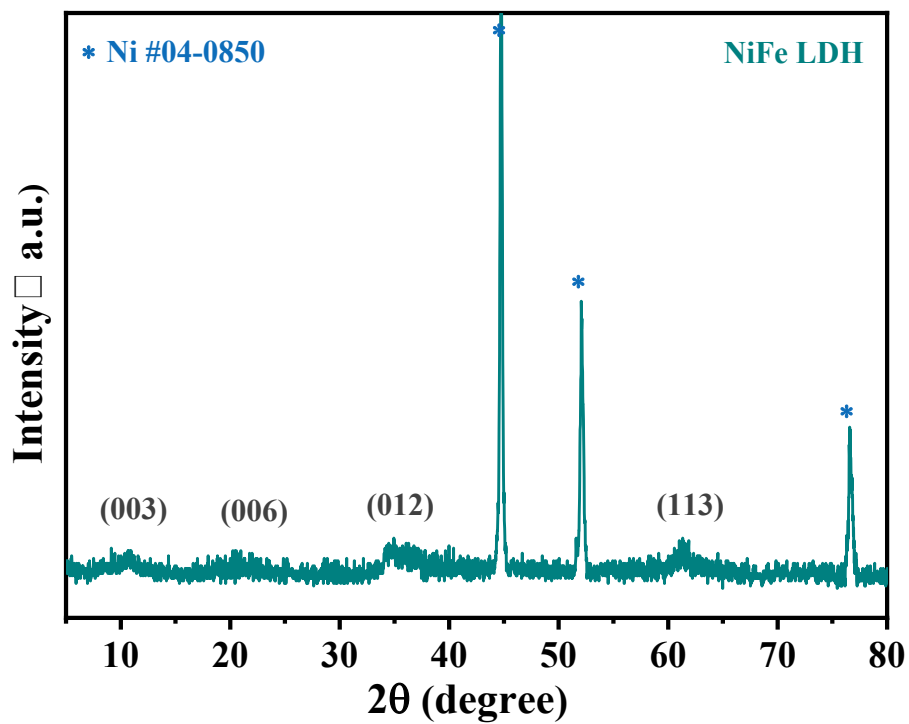

Fig. S7. XRD patterns of NiFe LDH.

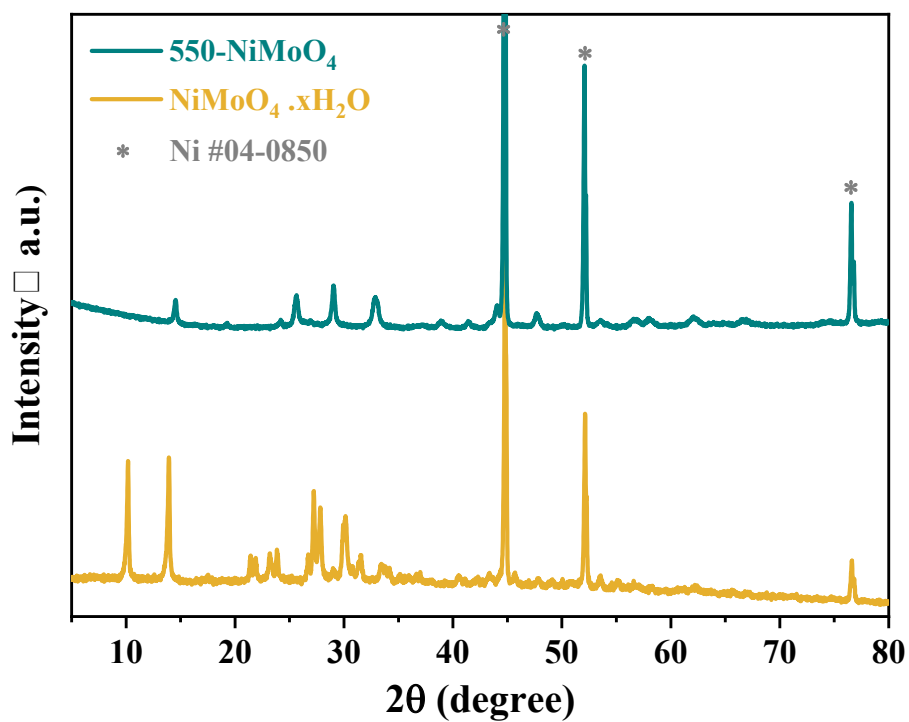

Fig. S8. XRD patterns of annealed NiMoO<sub>4</sub> and NiMoO<sub>4</sub>.xH<sub>2</sub>O.

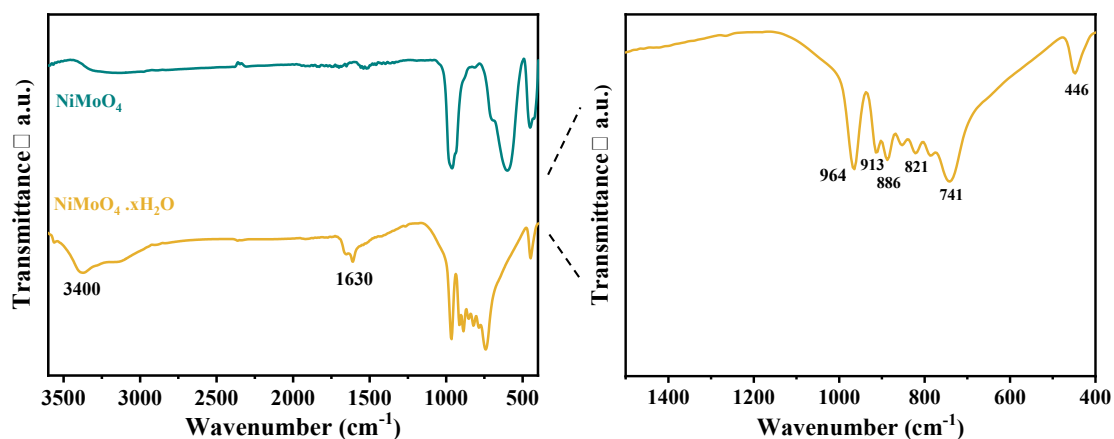

**Fig. S9.** FTIR spectra of annealed NiMoO<sub>4</sub> and NiMoO<sub>4</sub>·xH<sub>2</sub>O with the magnified spectra.

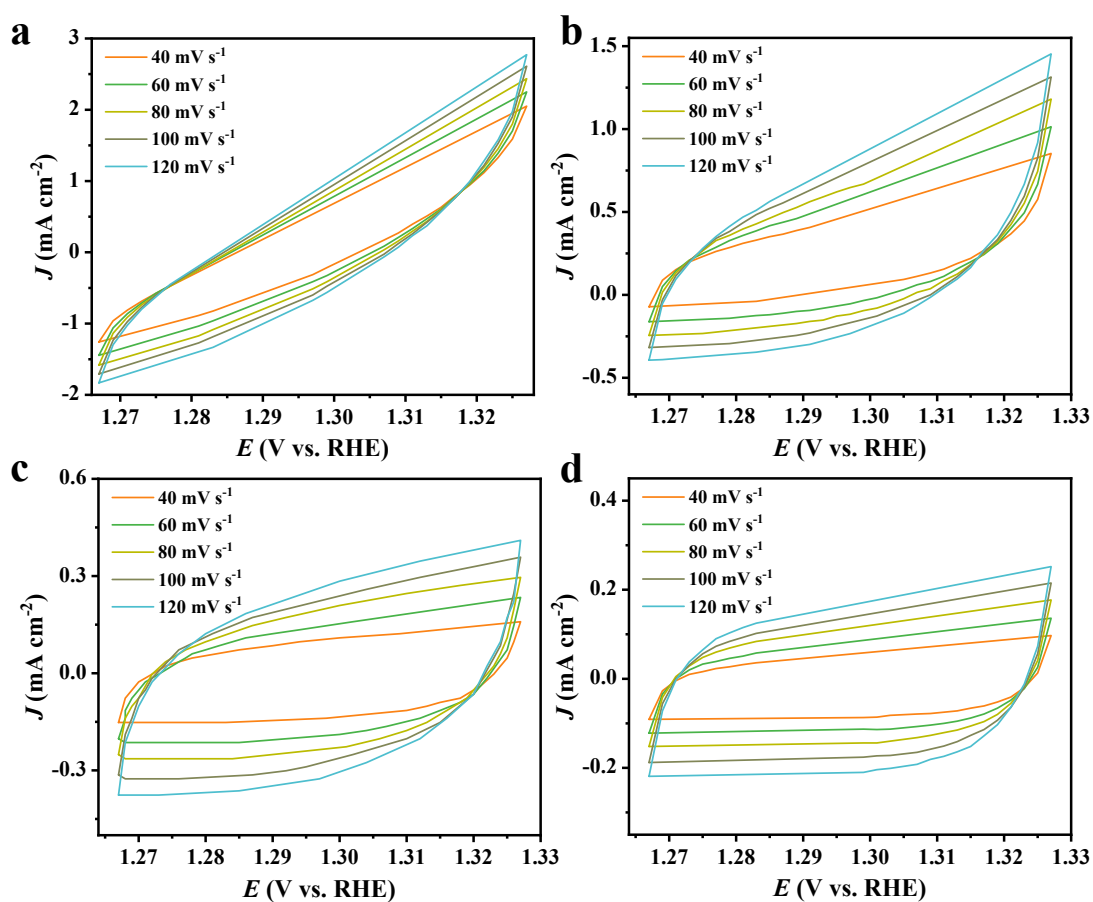

**Fig. S10.** Typical cyclic voltammograms at different scan rates. (a) NiMoO<sub>4</sub>@NiFe LDH, (b) NiMoO<sub>4</sub>·xH<sub>2</sub>O, (c) NiFe LDH and (d) NF with scan rates ranging from 40 mV/s to 120 mV/s with an interval point of 20 mV/s.

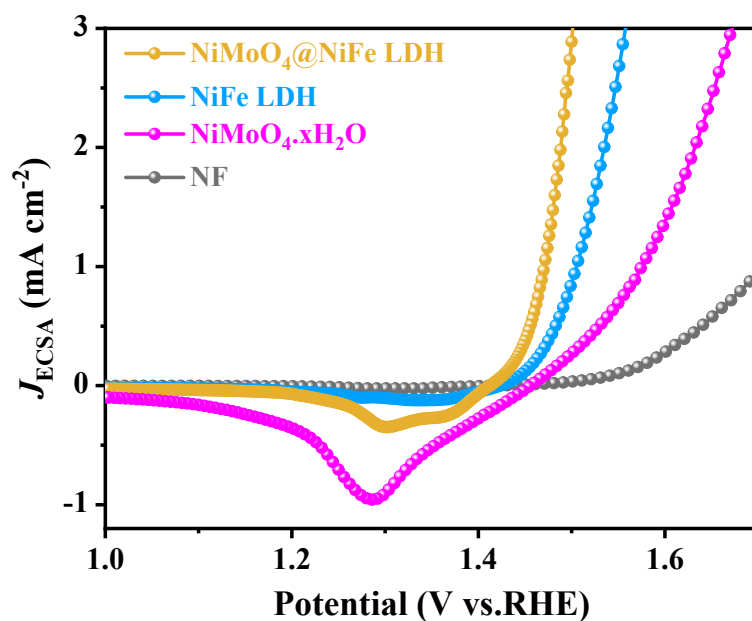

**Fig. S11.** ECSA normalized polarization curves for NiMoO<sub>4</sub>@NiFe LDH, NiFe LDH, NiMoO<sub>4</sub>.xH<sub>2</sub>O and NF.

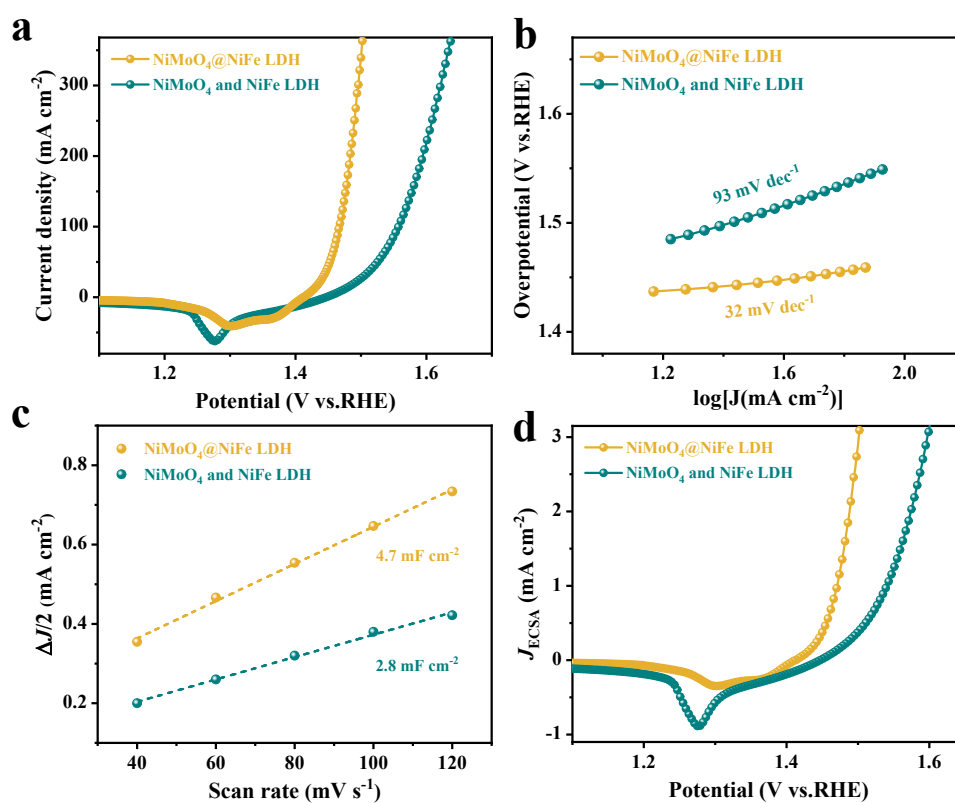

**Fig. S12.** (a) OER Polarization curves, (b) corresponding Tafel plots, (c) electrical double layer capacitance ( $C_{dl}$ ) and (d) ECSA normalized polarization curves of core-shell NiMoO<sub>4</sub>@NiFe LDH catalysts and physically mixed composite.

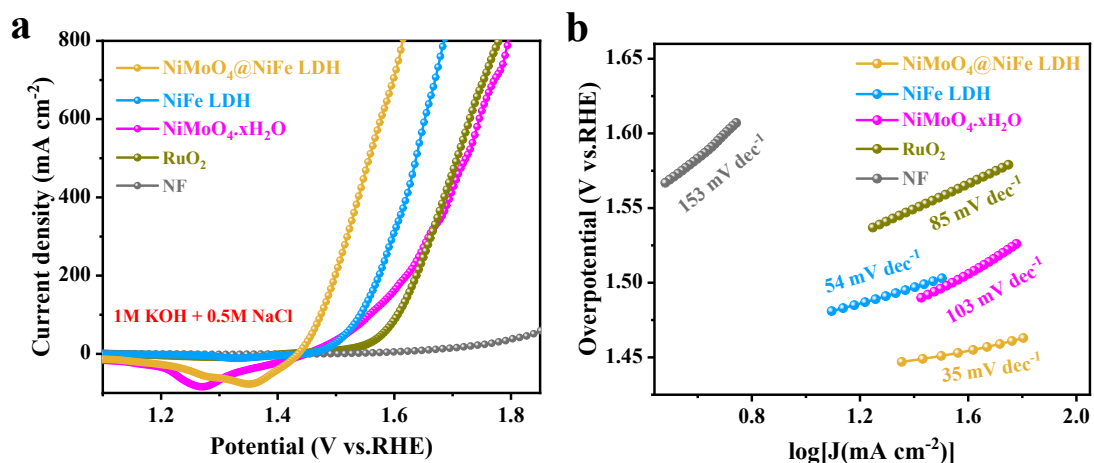

**Fig. S13.** (a) OER Polarization curves and (b) corresponding Tafel plots of the studied catalysts in 1M KOH + 0.5 M NaCl electrolyte.

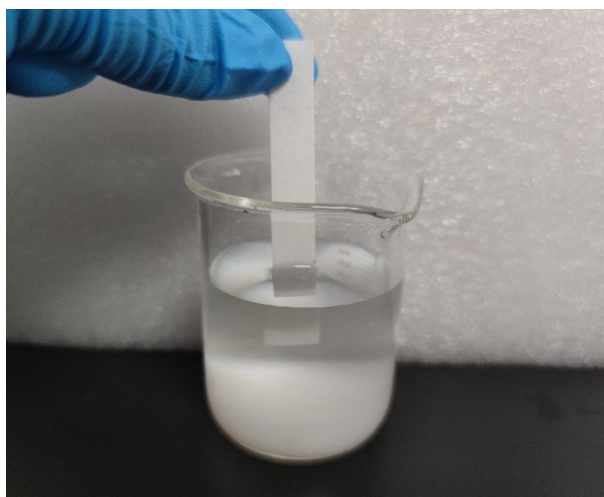

**Fig. S14.** The digital photograph of the results for ClO<sup>-</sup> formation in 1 M KOH seawater electrolyte after OER stability testing of NiMoO<sub>4</sub>@NiFe LDH at 100 mA cm<sup>-2</sup> for 80 h. The formation of hypochlorite (ClO<sup>-</sup>) was examined via the potassium iodide starch paper.



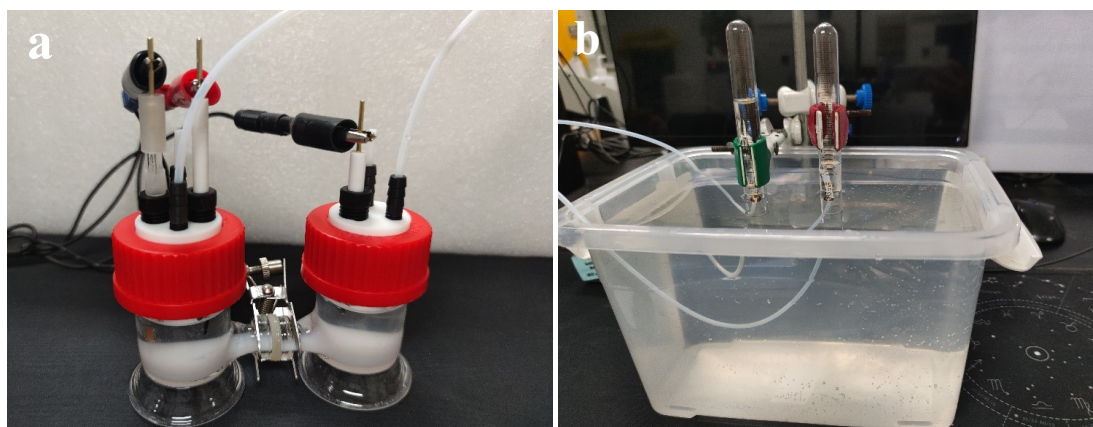

**Fig. S15.** Photograph of the (a) H type cell and (b) gas collection device.

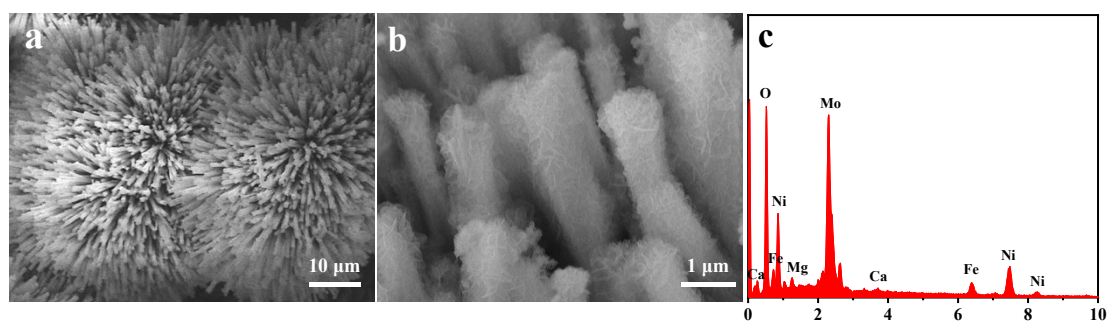

**Fig. S16.** (a-b) SEM images and (c) EDS spectrum of  $\text{NiMoO}_4@\text{NiFe}$  LDH catalyst after immersion in natural seawater for 15 days.

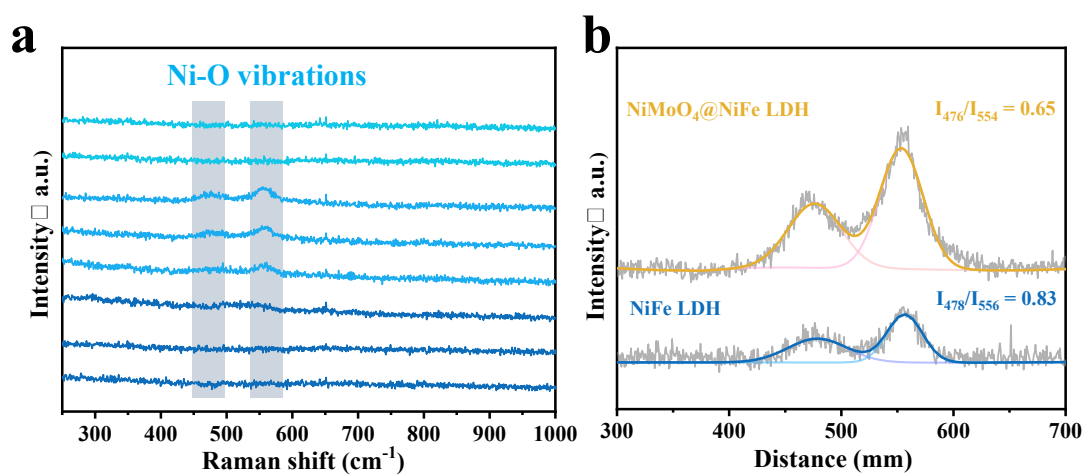

**Fig. S17.** (a) In-situ Raman spectra of NiFe LDH in 1 M KOH during the OER process. (b) Raman bands of  $\text{NiMoO}_4@\text{NiFe}$  LDH and NiFe LDH measured at 1.6 V versus RHE.

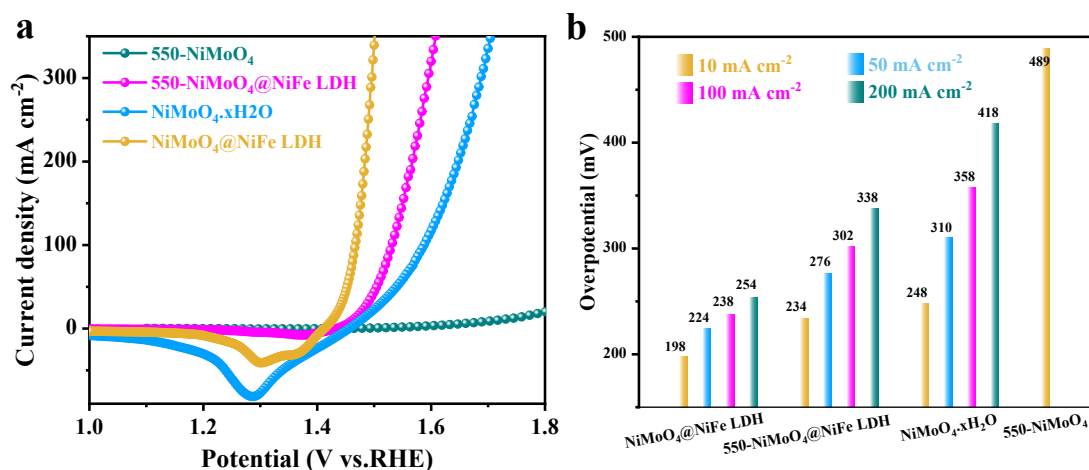

**Fig. S18.** OER polarization curves of NiMoO<sub>4</sub>·xH<sub>2</sub>O, NiMoO<sub>4</sub>@NiFe LDH, annealed NiMoO<sub>4</sub> and annealed NiMoO<sub>4</sub>@NiFe LDH in 1 M KOH electrolyte. (b) Comparison of the overpotentials required for these catalysts to attain current densities of 10, 50, 100, and 200 mA cm<sup>-2</sup> for OER.

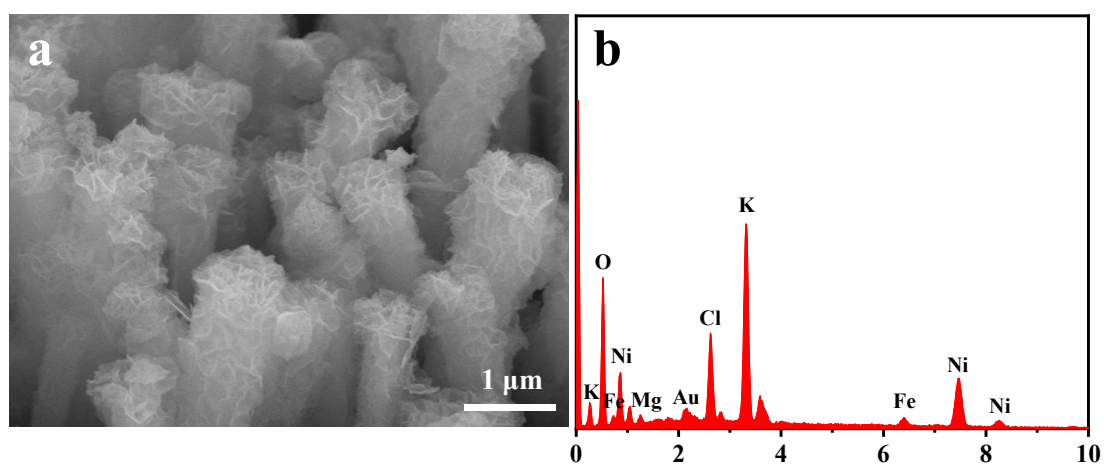

**Fig. S19.** (a) SEM images and (b) EDS spectrum of NiMoO<sub>4</sub>@NiFe LDH catalyst after OER test in 1 M KOH seawater.

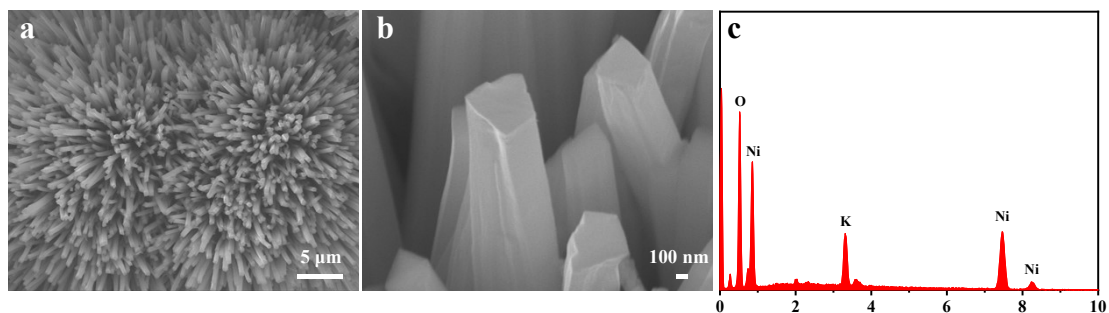

**Fig. S20.** (a-b) SEM images and (c) EDS spectrum of  $\text{NiMoO}_4 \cdot x\text{H}_2\text{O}$  catalyst after OER test in 1 M KOH.

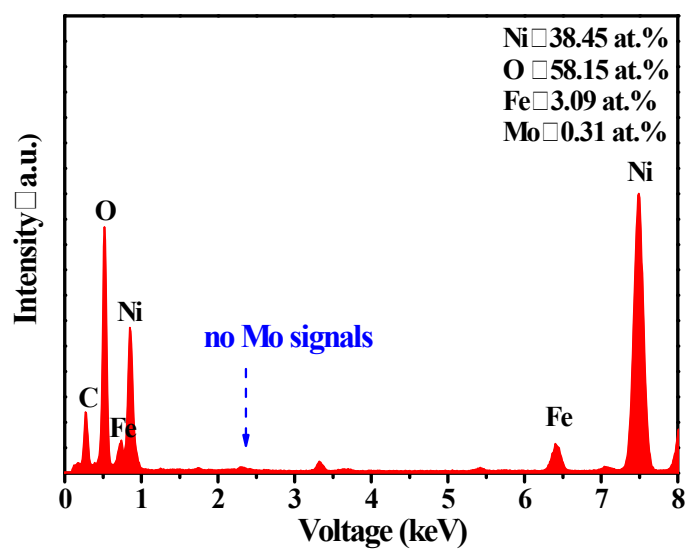

**Fig. S21.** EDS map sum spectrum of  $\text{NiMoO}_4 @ \text{NiFe}$  LDH catalyst after OER test in 1 M KOH.

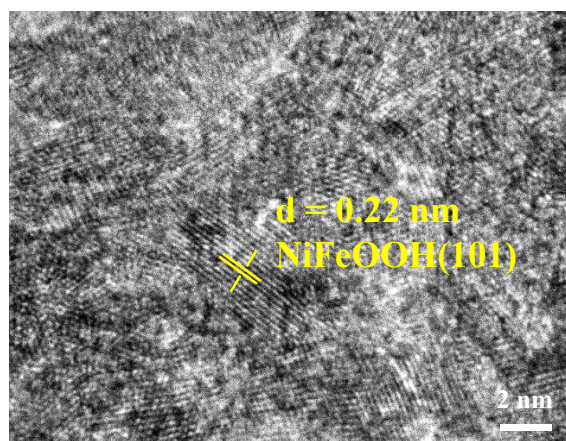

**Fig. S22.** The high-magnification TEM image of NiMoO<sub>4</sub>@NiFe LDH catalyst after OER test in 1 M KOH.

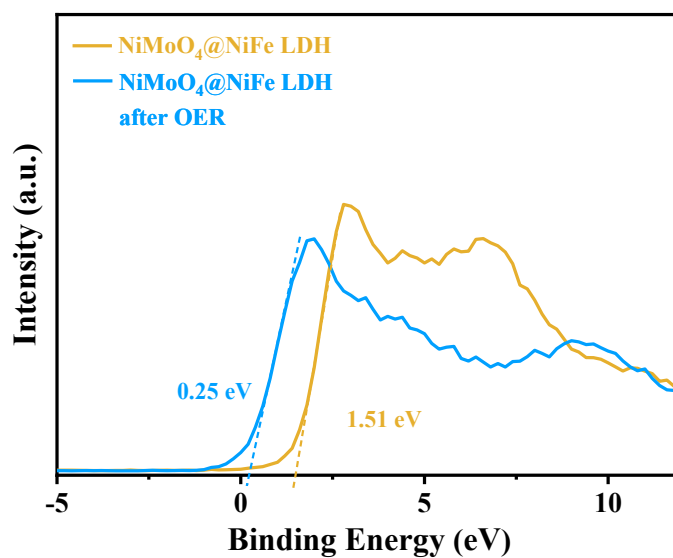

**Fig. S23.** Valence band spectra of NiMoO<sub>4</sub>@NiFe LDH before and after OER catalysis in 1 M KOH.

**Table S1.** Comparison of OER performance of NiMoO<sub>4</sub>@NiFe LDH with some previously reported NiFe-based catalysts in 1.0 M KOH solution.

| Catalysts                                                  | Electrolyte      | $\eta$ (mV) at<br>10 mA<br>cm <sup>-2</sup> | Tafel slope<br>(mV/dec) | Reference               |
|------------------------------------------------------------|------------------|---------------------------------------------|-------------------------|-------------------------|
| <b>NiMoO<sub>4</sub>@NiFe LDH</b>                          | <b>1.0 M KOH</b> | <b>198</b>                                  | <b>32</b>               | <b><i>This work</i></b> |
| Fe-doped $\beta$ -Ni(OH) <sub>2</sub>                      | 1.0 M KOH        | 219                                         | 53                      | 1                       |
| hcp-NiFe@NC                                                | 1.0 M KOH        | 226                                         | 41                      | 2                       |
| Fe <sub>0.052</sub> Ni-POMo                                | 1.0 M KOH        | 255.3 $\pm$<br>1.6                          | 43.8                    | 3                       |
| NiFe-based<br>SURMOFs                                      | 0.1 M KOH        | 300                                         | 44.3                    | 4                       |
| NiFe-LDH                                                   | 1.0 M KOH        | 275                                         | 56.7                    | 5                       |
| Ni Fe MOF                                                  | 0.1 M KOH        | 240                                         | 34                      | 6                       |
| NiOOH/FeOOH NBs                                            | 1.0 M KOH        | 246                                         | 41                      | 7                       |
| Ni <sub>0.8</sub> Co <sub>0.1</sub> Fe <sub>0.1</sub> OxHy | 1.0 M KOH        | 239                                         | 45.4                    | 8                       |
| Ni <sup>II</sup> Fe <sup>III</sup> @NC                     | 1.0 M KOH        | 360                                         | 81                      | 9                       |
| NiFe@N doped<br>carbon                                     | 0.1 M KOH        | 350                                         | 56                      | 10                      |
| Fe/(Ni)OOH                                                 | 1.0 M KOH        | 290                                         | 32                      | 11                      |
| Ni <sub>2/3</sub> Fe <sub>1/3</sub> LDH                    | 1.0 M KOH        | 310                                         | 76                      | 12                      |
| Fe-S-NiMoO <sub>4</sub> /MoO <sub>3</sub>                  | 1.0 M KOH        | 212                                         | 41                      | 13                      |
| Ni (Fe)OxHy                                                | 1.0 M KOH        | 218 $\pm$ 5                                 | 31 $\pm$ 4              | 14                      |
| NiCoFe-P-<br>NP@NiCoFe-PBA                                 | 1.0 M KOH        | 223                                         | 78                      | 15                      |

|                    |           |     |    |    |
|--------------------|-----------|-----|----|----|
| NiFe/NiFe-OH       | 1.0 M KOH | 222 | 41 | 16 |
| MnCo-CH@NiFe-OH    | 1.0 M KOH | 186 | 49 | 17 |
| a-NiFe-OH/NiFeP/NF | 1.0 M KOH | 199 | 39 | 18 |

**Table S2.** Comparison of OER performance of NiMoO<sub>4</sub>@NiFe LDH with some previously reported catalysts for seawater oxidation.

| Catalysts                                                           | Electrolyte                 | $\eta$ (mV) at<br>100 mA<br>cm <sup>-2</sup> | $\eta$ (mV) at 500<br>mA cm <sup>-2</sup> | Referenc<br>e               |
|---------------------------------------------------------------------|-----------------------------|----------------------------------------------|-------------------------------------------|-----------------------------|
| <b>NiMoO<sub>4</sub>@NiFe LDH</b>                                   | <b>1 M KOH<br/>seawater</b> | <b>251</b>                                   | <b>349</b>                                | <b><i>This<br/>work</i></b> |
| Ni <sub>3</sub> S <sub>2</sub> /Co <sub>3</sub> S <sub>4</sub>      | 1 M KOH<br>seawater         | 360                                          | 440                                       | 19                          |
| Ni <sub>3</sub> FeN@C                                               | 1 M KOH<br>seawater         | 283                                          | 351                                       | 20                          |
| MoS <sub>2</sub> -(FeNi) <sub>9</sub> S <sub>8</sub>                | 1 M KOH<br>seawater         | 256                                          | 329                                       | 21                          |
| Gd-Mn <sub>3</sub> O <sub>4</sub> @ CuO-<br>Cu(OH) <sub>2</sub>     | 1 M KOH<br>seawater         | -                                            | 400                                       | 22                          |
| Ir <sub>1</sub> /Ni <sub>1.6</sub> Mn <sub>1.4</sub> O <sub>4</sub> | 0.5 M KOH<br>seawater       | 330                                          | -                                         | 23                          |
| B-Co <sub>2</sub> Fe LDH                                            | 1 M KOH<br>seawater         | 310                                          | 376                                       | 24                          |
| NiFe LDH                                                            | 1 M KOH<br>seawater         | 247                                          | 296                                       | 25                          |
| CoPx@FeOOH                                                          | 1 M KOH<br>seawater         | 283                                          | 337                                       | 26                          |

|                                         |                     |     |     |    |
|-----------------------------------------|---------------------|-----|-----|----|
| S-(Ni,Fe)OOH                            | 1 M KOH<br>seawater | 300 | 398 | 27 |
| Ni <sub>3</sub> S <sub>2</sub> /Fe-NiPx | 1 M KOH<br>seawater | 290 | 336 | 28 |

## References

1. T. Kou, S. Wang, J. L. Hauser, M. Chen, S. R. J. Oliver, Y. Ye, J. Guo and Y. Li, *ACS Energy Letters*, 2019, 4, 622-628.
2. C. Wang, H. Yang, Y. Zhang and Q. Wang, *Angew. Chem. Int. Ed.*, 2019, 58, 6099-6103.
3. X. Liu, F. Xia, R. Guo, M. Huang, J. Meng, J. Wu and L. Mai, *Adv. Funct. Mater.*, 2021, 31, 2101792.
4. S. Hou, W. Li, S. Watzele, R. M. Kluge, S. Xue, S. Yin, X. Jiang, M. Döblinger, A. Welle, B. Garlyyev, M. Koch, P. Müller-Buschbaum, C. Wöll, A. S. Bandarenka and R. A. Fischer, *Adv. Mater.*, 2021, 33, 2103218.
5. M. Liu, L. Kong, X. Wang, J. He and X.-H. Bu, *Small*, 2019, 15, 1903410.
6. J. Duan, S. Chen and C. Zhao, *Nature Communications*, 2017, 8, 15341.
7. P. Yan, Q. Liu, H. Zhang, L. Qiu, H. B. Wu and X.-Y. Yu, *Journal of Materials Chemistry A*, 2021, 9, 15586-15594.
8. Q. Zhao, J. Yang, M. Liu, R. Wang, G. Zhang, H. Wang, H. Tang, C. Liu, Z. Mei, H. Chen and F. Pan, *ACS Catalysis*, 2018, 8, 5621-5629.
9. L. Du, L. Luo, Z. Feng, M. Engelhard, X. Xie, B. Han, J. Sun, J. Zhang, G. Yin, C. Wang, Y. Wang and Y. Shao, *Nano Energy*, 2017, 39, 245-252.
10. Z. Zhang, Y. Qin, M. Dou, J. Ji and F. Wang, *Nano Energy*, 2016, 30, 426-433.
11. H. Zhong, J. Wang, F. Meng and X. Zhang, *Angew. Chem. Int. Ed.*, 2016, 55, 9937-9941.
12. W. Ma, R. Ma, C. Wang, J. Liang, X. Liu, K. Zhou and T. Sasaki, *ACS Nano*, 2015, 9, 1977-1984.
13. Y. Zhang, H. Guo, J. Ren, X. Li, W. Ren and R. Song, *Applied Catalysis B: Environmental*, 2021, 298, 120582.
14. Q. Xu, H. Jiang, X. Duan, Z. Jiang, Y. Hu, S. W. Boettcher, W. Zhang, S. Guo and C. Li, *Nano Lett.*, 2021, 21, 492-499.
15. G. Zhang, Y. Li, X. Xiao, Y. Shan, Y. Bai, H.-G. Xue, H. Pang, Z. Tian and Q.

- Xu, *Nano Lett.*, 2021, 21, 3016-3025.
16. W. Zhu, W. Chen, H. Yu, Y. Zeng, F. Ming, H. Liang, Z. Wang, *Appl. Catal. B: Environ.*, 2020, 278, 119326.
  17. Y. Zeng, Z. Cao, J. Liao, H. Liang, B. Wei, X. X, H. Xu, J. Zheng, W. Zhu, L. Cavallo, Z. Wang, *Appl. Catal. B: Environ.*, 2021, 292, 120160.
  18. H. Liang, A. N. Gandi, C. Xia, M. N. Hedhili, D. H. Anjum, U. Schwingenschlögl, and H. N. Alshareef, *ACS Energy Lett.*, 2017, 2, 1035-1042.
  19. C. Wang, M. Zhu, Z. Cao, P. Zhu, Y. Cao, X. Xu, C. Xu and Z. Yin, *Applied Catalysis B: Environmental*, 2021, 291, 120071.
  20. B. Wang, M. Lu, D. Chen, Q. Zhang, W. Wang, Y. Kang, Z. Fang, G. Pang and S. Feng, *Journal of Materials Chemistry A*, 2021, 9, 13562-13569.
  21. S. Song, Y. Wang, S. Zhou, H. Gao, X. Tian, Y. Yuan, W. Li and J. Zang, *ACS Applied Energy Materials*, 2022, 5, 1810-1821.
  22. T. ul Haq, S. Mansour and Y. Haik, *ACS Applied Materials & Interfaces*, 2022, 14, 20443-20454.
  23. N. Wen, Y. Xia, H. Wang, D. Zhang, H. Wang, X. Wang, X. Jiao and D. Chen, *Advanced Science*, 2022, n/a, 2200529.
  24. L. Wu, L. Yu, Q. Zhu, B. McElhenny, F. Zhang, C. Wu, X. Xing, J. Bao, S. Chen and Z. Ren, *Nano Energy*, 2021, 83, 105838.
  25. M. Ning, L. Wu, F. Zhang, D. Wang, S. Song, T. Tong, J. Bao, S. Chen, L. Yu and Z. Ren, *Materials Today Physics*, 2021, 19, 100419.
  26. L. Wu, L. Yu, B. McElhenny, X. Xing, D. Luo, F. Zhang, J. Bao, S. Chen and Z. Ren, *Applied Catalysis B: Environmental*, 2021, 294, 120256.
  27. L. Yu, L. Wu, B. McElhenny, S. Song, D. Luo, F. Zhang, Y. Yu, S. Chen and Z. Ren, *Energy & Environmental Science*, 2020, 13, 3439-3446.
  28. X. Luo, P. Ji, P. Wang, X. Tan, L. Chen and S. Mu, *Advanced Science*, 2022, 9, 2104846.
